# Supplementary material for: Impact of stringent non-pharmaceutical interventions applied during the second and third COVID-19 epidemic waves in Portugal, 9 November 2020 to 10 February 2021: an ecological study
Source: PubMed Central journal article supplement (PMC9198658; doi:10.2807/1560-7917.es.2022.27.23.2100497), 2022-06-09
Supplement: 21-00497_TORRES_Supplement.pdf [file 21-00497_TORRES_Supplement.pdf]

## SUPPLEMENTARY MATERIAL

This supplementary material is hosted by Eurosurveillance as supporting information alongside the article "Impact of strict social distancing measures applied in Portugal during the second and third COVID-19 epidemic waves", on behalf of the authors, who remain responsible for the accuracy and appropriateness of the content. The same standards for ethics, copyright, attributions and permissions as for the article apply. Supplements are not edited by Eurosurveillance and the journal is not responsible for the maintenance of any links or email addresses provided therein.

Figure S1. (1) COVID-19 incidence rates<sup>a</sup> before and after tiered non-pharmaceutical interventions and lockdown, Portugal, 30 September 2020–10 February 2021 (2) Average daily temperatures, Portugal, 30 September 2020–10 February 2021

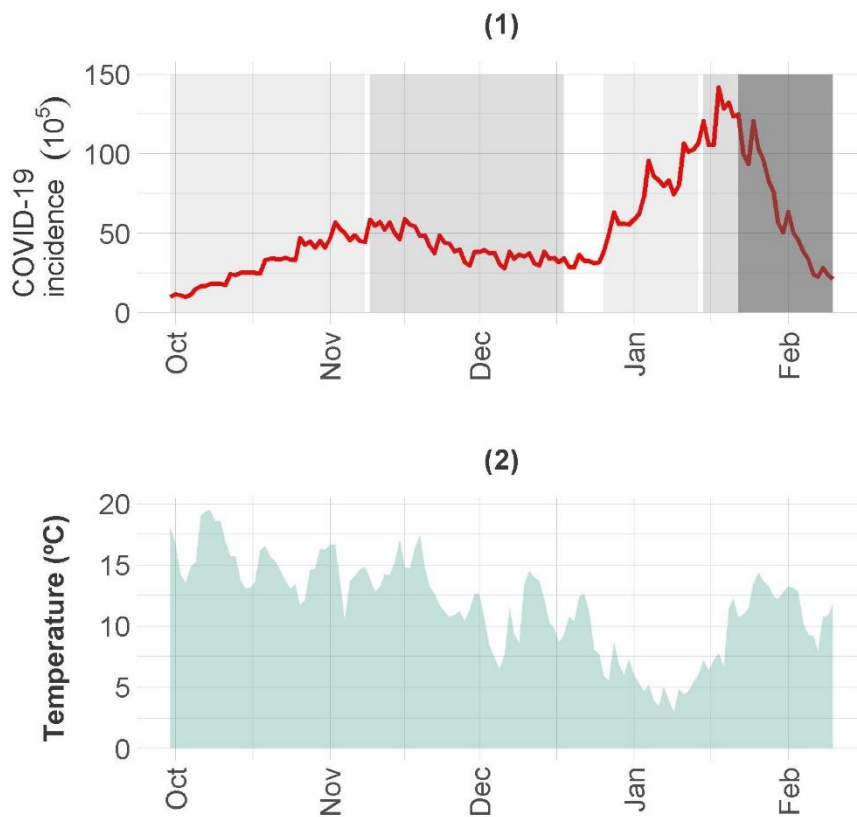

COVID-19: coronavirus disease; NPI: non-pharmaceutical interventions.

<sup>a</sup> Per 100,000 population.

The lighter shaded grey areas represent the analysis periods before tiered non-pharmaceutical interventions and lockdown. The medium and darker shaded grey areas represent the analysis periods after the implementation of tiered non-pharmaceutical interventions and lockdown.

**Table S1. Sensitivity analyses with varying time lag for daily trends in COVID-19 incidence rate before and after implementation of tiered non-pharmaceutical interventions, Portugal, 30 September–18 December 2020 (n= 297,754)**

| Lag | Study period                         |             |                                  |             | Change in trend | 95% CI      | p value <sup>a</sup> |
|-----|--------------------------------------|-------------|----------------------------------|-------------|-----------------|-------------|----------------------|
|     | Pre-tiered NPIs<br>30 Sep–8 Nov 2020 |             | Tiered NPIs<br>9 Nov–18 Dec 2020 |             |                 |             |                      |
|     | IRR                                  | 95% CI      | IRR                              | 95% CI      |                 |             |                      |
| 2   | 1.035                                | 1.032-1.037 | 0.982                            | 0.975-0.990 | 0.949           | 0.945-0.954 | <0.001               |
| 3   | 1.032                                | 1.029-1.035 | 0.982                            | 0.974-0.989 | 0.951           | 0.947-0.956 | <0.001               |
| 4   | 1.030                                | 1.027-1.033 | 0.981                            | 0.974-0.989 | 0.953           | 0.948-0.958 | <0.001               |
| 5   | 1.028                                | 1.025-1.031 | 0.981                            | 0.973-0.989 | 0.954           | 0.949-0.959 | <0.001               |
| 6   | 1.026                                | 1.023-1.029 | 0.981                            | 0.972-0.989 | 0.955           | 0.950-0.961 | <0.001               |
| 7   | 1.024                                | 1.021-1.027 | 0.980                            | 0.972-0.989 | 0.957           | 0.951-0.963 | <0.001               |
| 8   | 1.022                                | 1.019-1.025 | 0.980                            | 0.971-0.989 | 0.959           | 0.953-0.964 | <0.001               |
| 9   | 1.020                                | 1.017-1.023 | 0.980                            | 0.971-0.989 | 0.961           | 0.955-0.967 | <0.001               |
| 10  | 1.017                                | 1.014-1.020 | 0.980                            | 0.971-0.989 | 0.963           | 0.957-0.969 | <0.001               |
| 11  | 1.016                                | 1.012-1.019 | 0.980                            | 0.971-0.989 | 0.965           | 0.959-0.971 | <0.001               |
| 12  | 1.014                                | 1.010-1.017 | 0.980                            | 0.970-0.990 | 0.967           | 0.960-0.974 | <0.001               |

COVID-19: coronavirus disease; CI: confidence interval; IRR: incidence rate ratio; NPIs: non-pharmaceutical interventions.

<sup>a</sup> Two-sided Wald test p values were obtained from negative binomial regression models. A p value < 0.05 was considered evidence of statistical significance.

**Table S2. Sensitivity analyses with varying time lag for daily trends in COVID-19 incidence rate before and after lockdown implementation with and without school closure, Portugal, 26 December 2020–10 February 2021 (n = 372,680)**

| Lag | Study period                                         |             |                                                          |             |                                                                   |             | Change in trend        |             |                      |                     |             |                      |
|-----|------------------------------------------------------|-------------|----------------------------------------------------------|-------------|-------------------------------------------------------------------|-------------|------------------------|-------------|----------------------|---------------------|-------------|----------------------|
|     | Pre-lockdown<br>26 December 2020–<br>14 January 2021 |             | Lockdown without<br>school closure<br>15–21 January 2021 |             | Lockdown with school<br>closure<br>22 January–10 February<br>2021 |             | Without school closure |             |                      | With school closure |             |                      |
|     | IRR                                                  | 95% CI      | IRR                                                      | 95% CI      | IRR                                                               | 95% CI      | Change in<br>IRR       | 95% CI      | p value <sup>a</sup> | Change in<br>IRR    | 95% CI      | p value <sup>a</sup> |
| 2   | 1.042                                                | 1.033-1.051 | 1.012                                                    | 0.979-1.047 | 0.903                                                             | 0.852-0.958 | 0.971                  | 0.948-0.996 | 0.023                | 0.892               | 0.870-0.915 | <0.001               |
| 3   | 1.042                                                | 1.033-1.051 | 0.996                                                    | 0.963-1.030 | 0.901                                                             | 0.849-0.956 | 0.956                  | 0.932-0.980 | <0.001               | 0.904               | 0.881-0.928 | <0.001               |
| 4   | 1.041                                                | 1.032-1.049 | 0.981                                                    | 0.950-1.013 | 0.899                                                             | 0.848-0.952 | 0.942                  | 0.920-0.965 | <0.001               | 0.916               | 0.893-0.940 | <0.001               |
| 5   | 1.038                                                | 1.029-1.046 | 0.966                                                    | 0.935-0.998 | 0.897                                                             | 0.846-0.951 | 0.931                  | 0.909-0.954 | <0.001               | 0.928               | 0.904-0.953 | <0.001               |
| 6   | 1.034                                                | 1.026-1.043 | 0.952                                                    | 0.921-0.983 | 0.896                                                             | 0.843-0.951 | 0.920                  | 0.898-0.943 | <0.001               | 0.941               | 0.916-0.967 | <0.001               |
| 7   | 1.031                                                | 1.022-1.039 | 0.938                                                    | 0.907-0.969 | 0.895                                                             | 0.841-0.953 | 0.910                  | 0.887-0.933 | <0.001               | 0.955               | 0.927-0.983 | 0.002                |
| 8   | 1.028                                                | 1.019-1.036 | 0.922                                                    | 0.891-0.955 | 0.896                                                             | 0.838-0.957 | 0.898                  | 0.874-0.922 | <0.001               | 0.971               | 0.941-1.002 | 0.068                |
| 9   | 1.028                                                | 1.019-1.037 | 0.905                                                    | 0.874-0.938 | 0.898                                                             | 0.838-0.962 | 0.881                  | 0.857-0.904 | <0.001               | 0.992               | 0.959-1.026 | 0.637                |
| 10  | 1.025                                                | 1.016-1.034 | 0.892                                                    | 0.859-0.925 | 0.899                                                             | 0.835-0.969 | 0.870                  | 0.846-0.895 | <0.001               | 1.008               | 0.971-1.047 | 0.668                |
| 11  | 1.019                                                | 1.010-1.028 | 0.883                                                    | 0.851-0.917 | 0.899                                                             | 0.832-0.972 | 0.866                  | 0.842-0.891 | <0.001               | 1.018               | 0.978-1.060 | 0.379                |
| 12  | 1.012                                                | 1.003-1.021 | 0.874                                                    | 0.840-0.909 | 0.902                                                             | 0.828-0.982 | 0.864                  | 0.838-0.890 | <0.001               | 1.032               | 0.986-1.081 | 0.176                |

COVID-19: coronavirus disease; CI: confidence interval; IRR: incidence rate ratio.

<sup>a</sup> Two-sided Wald test p values were obtained from negative binomial regression models. A p value < 0.05 was considered evidence of statistical significance.
